# Supplementary material
Source: PubMed Central journal article supplement (PMC3725581)
Supplement: NIHMS470839-supplement-3.pdf [file NIHMS470839-supplement-3.pdf]

**Supplemental Table 1 - Tissue donor characteristics for populations shown in Figures 5b and 6.**

| #           | <i>Hp.</i><br>status | Age                        | Sex       | Histological findings                                 | TNF- $\alpha$<br>PCR | TMA        |
|-------------|----------------------|----------------------------|-----------|-------------------------------------------------------|----------------------|------------|
| 1           | neg.                 | 39                         | F         | Low grade chronic gastritis                           | X                    | X          |
| 2           | neg.                 | 19                         | F         | Normal                                                | X                    | X          |
| 3           | neg.                 | 60                         | F         | Low grade chronic gastritis                           | X                    | X          |
| 4           | neg.                 | 56                         | F         | Low grade chronic gastritis                           | X                    | X          |
| 5           | neg.                 | 57                         | M         | Low grade chronic gastritis                           |                      | X          |
| 6           | neg.                 | 43                         | F         | Not available                                         | X                    | X          |
| 7           | neg.                 | 15                         | M         | Not available                                         |                      | X          |
| 8           | neg.                 | 53                         | F         | Not available                                         | X                    |            |
| 9           | neg.                 | 37                         | F         | Low grade chronic gastritis                           | X                    |            |
| 10          | neg.                 | 60                         | F         | Not available                                         | X                    |            |
| 11          | neg.                 | 44                         | M         | Intestinal metaplasia                                 | X                    |            |
| 12          | neg.                 | 60                         | M         | Normal                                                | X                    |            |
| <b>n=12</b> |                      | <b>mean</b><br><b>45.3</b> | <b>8F</b> |                                                       | <b>n=10</b>          | <b>n=7</b> |
| 13          | pos.                 | 32                         | M         | Low grade chronic gastritis                           |                      | X          |
| 14          | pos.                 | 49                         | F         | Low grade chronic gastritis                           | X                    | X          |
| 15          | pos.                 | 22                         | F         | Moderate chronic gastritis<br>light glandular atrophy | X                    | X          |
| 16          | pos.                 | 63                         | F         | Low grade chronic gastritis                           |                      | X          |
| 17          | pos.                 | 44                         | F         | Low grade chronic gastritis                           | X                    | X          |
| 18          | pos.                 | 52                         | F         | Low grade chronic gastritis                           | X                    | X          |
| 19          | pos.                 | 50                         | M         | Low grade chronic gastritis                           |                      | X          |
| 20          | pos.                 | 46                         | F         | Not available                                         | X                    | X          |
| 21          | pos.                 | 47                         | M         | Not available                                         | X                    | X          |
| 22          | pos.                 | 36                         | F         | Moderate chronic gastritis                            | X                    |            |
| 23          | pos.                 | 60                         | F         | Low grade chronic gastritis                           | X                    |            |
| <b>n=11</b> |                      | <b>Mean</b><br><b>45.5</b> | <b>8F</b> |                                                       | <b>n=8</b>           | <b>n=9</b> |
