# Supplementary material
Source: PubMed Central journal article supplement (PMC3725581)

# Supplemental Figure 1

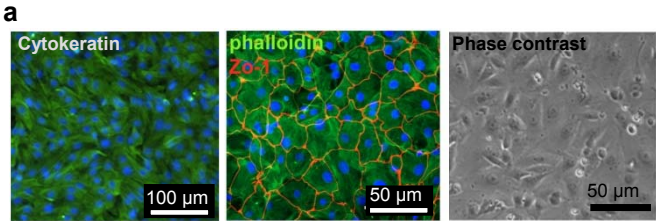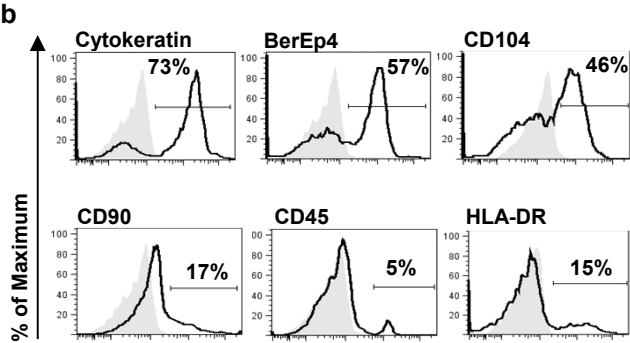

Supplement: NIHMS470839-supplement-1.pdf [file NIHMS470839-supplement-1.pdf]
